# Supplementary material
Source: HighWire-hosted journal article supplement (https://www.annfammed.org/highwire/filestream/13473/field_highwire_adjunct_files/0/_Patchett_Supp_App.pdf)

**Supplemental materials for:**

Patchett-Marble R. A Staff- and protocol-driven system to apply urine drug testing in primary care. *Ann Fam Med*. 2020;18(6):563.

Submitted April 26, 2019; submitted, revised, March 16, 2020; accepted March 24, 2020.

**Funding support:** Supported by the Northern Ontario Academic Medicine Association (NOAMA) AHSC AFP Innovation Fund award.

**Previous presentations:** Family Medicine Forum; November 2018; Toronto, Ontario, Canada; and Association of Family Health Teams of Ontario Annual Conference; September, 2019; Toronto, Ontario, Canada.

**References**

1. Gomes T, Pasricha S, Martins D, Greaves S. Behind the Prescriptions: A Snapshot of Opioid Use Across All Ontarians. Toronto, Canada: Ontario Drug Policy Research Network; 2017. Submitted April 26, 2019; submitted, revised, March 16, 2020; accepted March 24, 2020.
2. Argoff CE, Alford DP, Fudin J, et al. Rational urine drug monitoring in patients receiving opioids for chronic pain: consensus recommendations. *Pain Med*. 2018;19(1):97-117. 10.1093/pm/pnx285.

Supplemental Figures 1-3:

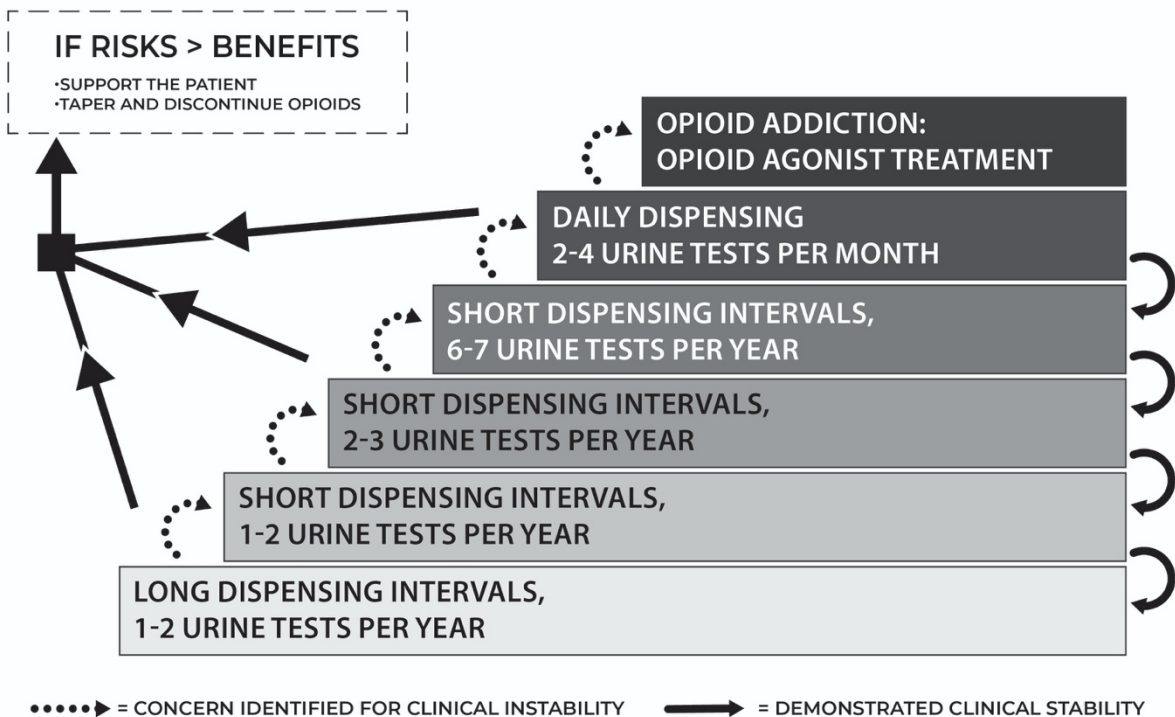

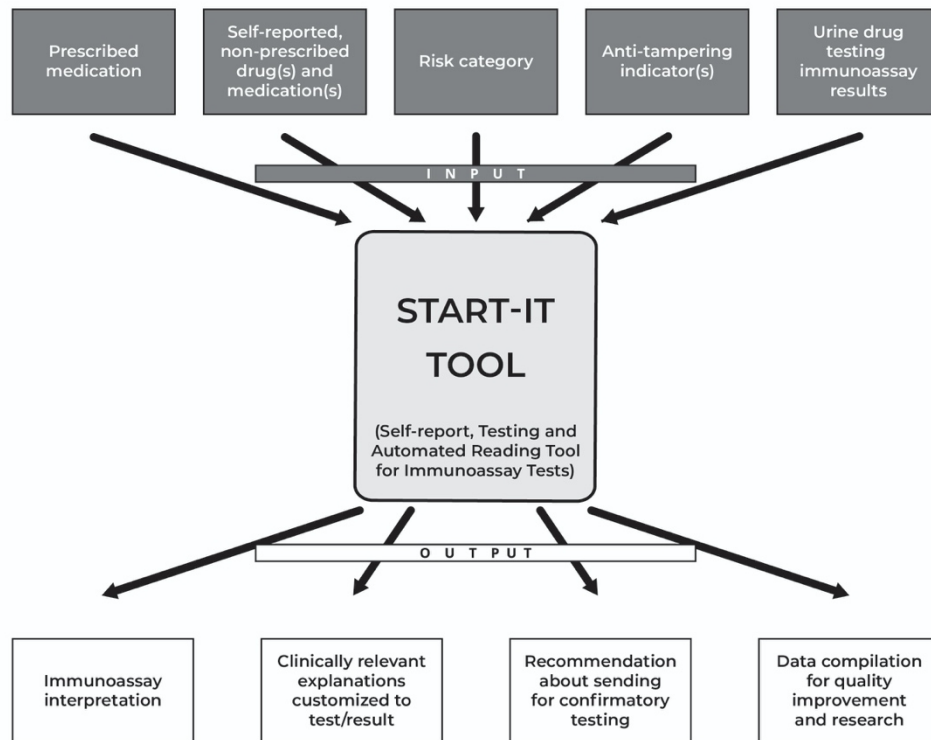

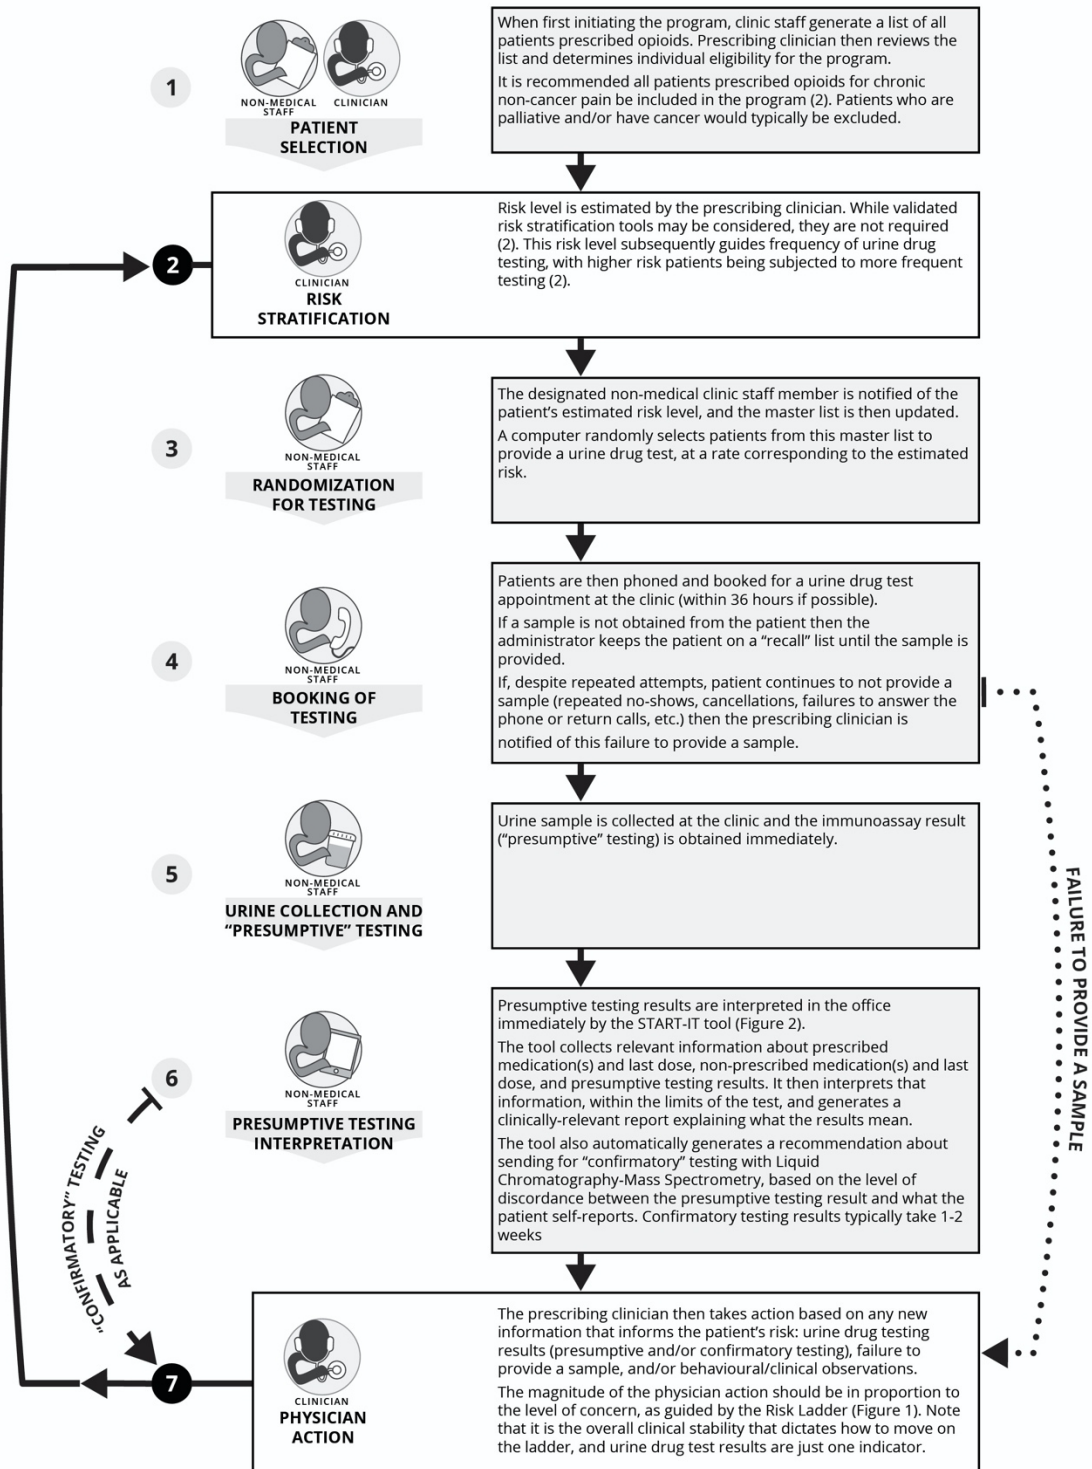

Supplement: _Patchett_Supp_App.pdf [file _Patchett_Supp_App.pdf]
